# Supplementary material for: An in vitro assay to measure antibody-mediated inhibition of P. berghei sporozoite invasion against P. falciparum antigens
Source: PubMed Central journal article supplement (PMC5717233; doi:10.1038/s41598-017-17274-5), 2017-12-05
Supplement: 41598_2017_17274_MOESM1_ESM.pdf [file 41598_2017_17274_MOESM1_ESM.pdf]

## An *in vitro* assay to measure antibody-mediated inhibition of *P. berghei* sporozoite invasion against *P. falciparum* antigens

Ana Rodríguez-Galán<sup>1,2</sup>, Ahmed M Salman<sup>1</sup>, Georgina Bowyer<sup>1</sup>, Katharine A. Collins<sup>1</sup>, Rhea J Longley<sup>1,3</sup>, Florian Brod<sup>1</sup>, Marta Ulaszewska<sup>1</sup>, Katie J Ewer<sup>1</sup>, Chris J Janse<sup>4</sup>, Shahid M Khan<sup>4</sup>, Julius C Hafalla<sup>2</sup>, Adrian VS Hill<sup>1</sup>, Alexandra J Spencer<sup>1\*</sup>

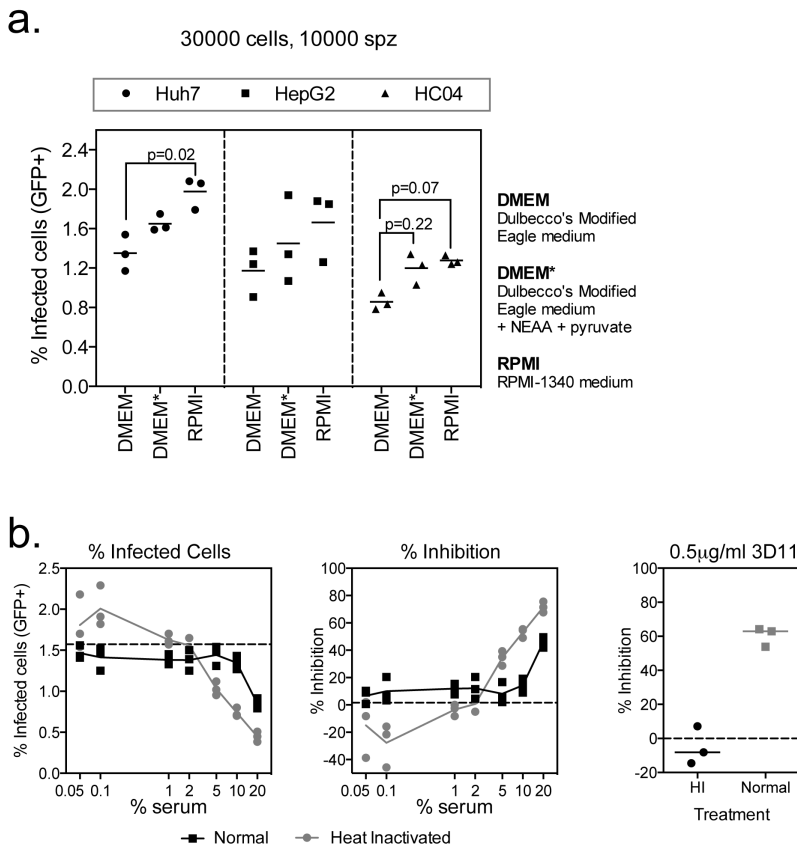

**Figure S1: Optimising culture conditions and treatment of serum for the ISI assay.**

**a.)** 30000 cells (Huh7, HepG2 or HC04) were seeded per well and infected with 10000 *PbGFP* sporozoites and cultured in DMEM, DMEM\* or RPMI medium overnight prior to harvesting and analysis of the percentage of infected cells by flow cytometry. Data was analysed with Kruskal-Wallis test, Dunn's multiple comparisons test (p-values below 0.3 are included in the graph).

**b.)** 15000 sporozoites (*PbGFP-Luc*) were added to 30000 Huh7 cells in the presence of various concentrations (0-20%) of serum from naive BALB/c mice or 1 µg/mL mAb-*PbCSP* that had either been heat inactivated (HI) (black) or untreated (grey). Graphs represent the

percentage of infected cells (left) or percentage of inhibition observed with increasing concentrations of naïve BALB/c serum (middle) or 1 $\mu$ g/ml mAb-*PbCSP* 3D11 (right).

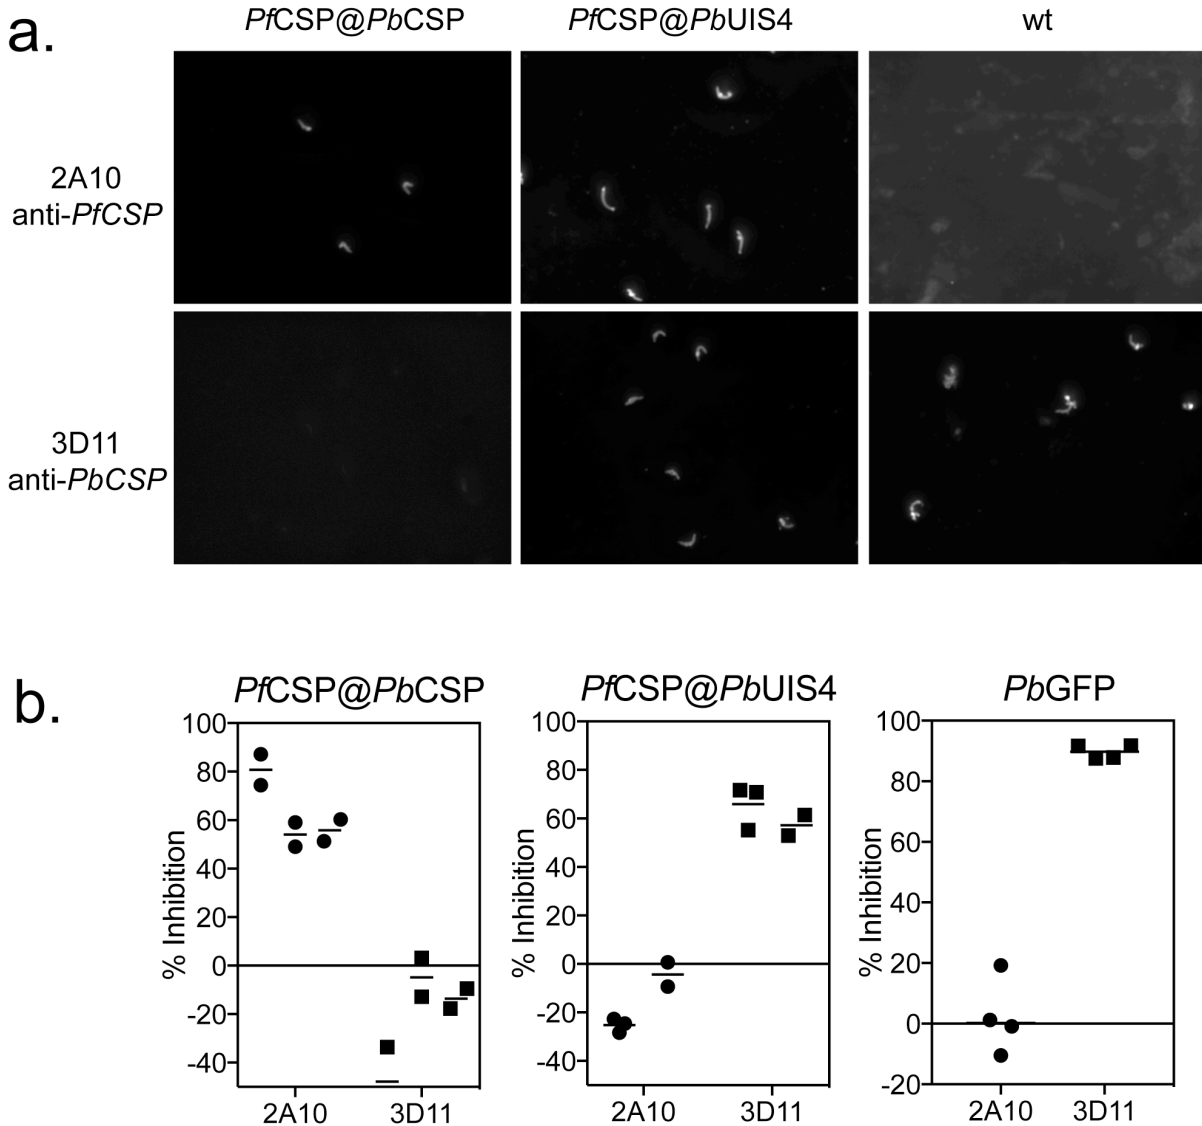

**Figure S2: Specificity of 2A10 and 3D11 monoclonal antibodies**

a.) *PfCSP@PbCSP*, *PfCSP@PbUIS4* or wild-type *P.berghei* salivary gland dissected sporozoites were stained with 0.1 $\mu$ g/ml of 2A10 or 3D11 monoclonal, followed by detection of bound antibody with anti-mouse Alexa488.

b.) Graphs represent the percentage of inhibition against *PfCSP@PbCSP*, *PfCSP@PbUIS4* or GFP sporozoites observed across different experiments following the addition of either 2A10 or 3D11 monoclonal antibody. GFP parasite data was acquired in two separate experiments.

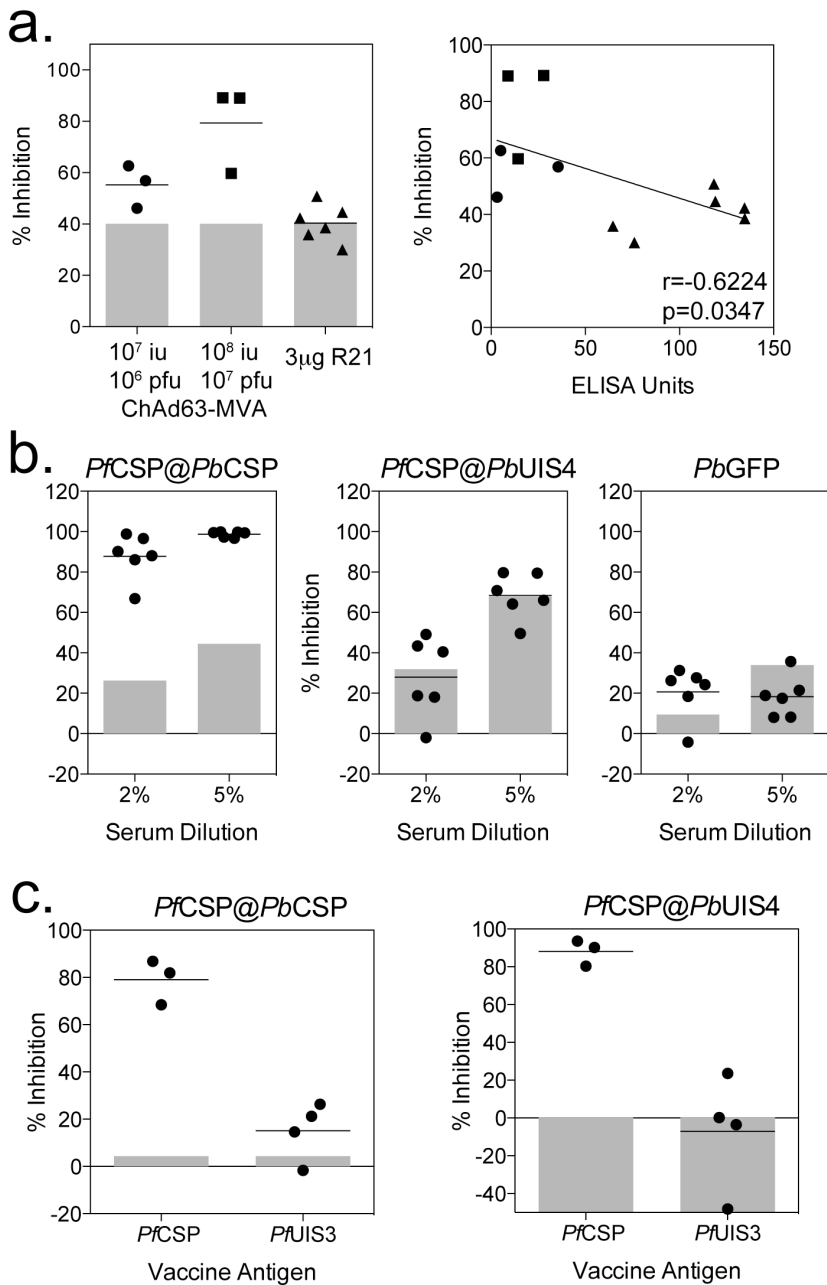

**Figure S3: Specificity of sporozoite inhibition observed by anti-*PfCSP* serum samples**

a.) 30000 Huh7 cells were seeded per well and rested overnight prior to the addition of 15000 *PfCSP@PbUIS4* sporozoite together with 2% serum from BALB/c mice vaccinated with  $10^7$  iu ChAd63.CSP  $10^6$  MVA.CSP (filled circle),  $10^8$  iu ChAd63.CSP  $10^7$  pfu MVA.CSP (closed squares),  $3\mu\text{g}$  R21 in Matrix M or naïve mice (grey bars). The percentage of inhibition was compared to antibody titres measured by ELISA (right) and analysed with a two-tailed Spearman's correlation.

b.) In a single experiment, 30000 Huh7 cells per well were seeded overnight prior to the addition of 2% or 5% serum dilutions and 15000 *PfCSP@PbCSP*, *PfCSP@PbUIS4* or *PbGFP*

sporozoites. Cells were harvested at least 24 hours later to measure the frequency of GFP<sup>+</sup> cells by flow cytometry and to calculate the percentage of inhibition of the samples against the three different *P. berghei* lines. The data from *PfCSP@PbUIS4* and *PfCSP@PbCSP* is also presented in Figure 4 of this manuscript. Grey bars represent the inhibition of naïve serum controls.

c.) In a single experiment, 30000 Huh7 cells per well were seeded overnight prior to the addition of 2% dilutions of serum from mice vaccinated with 10<sup>8</sup>iu ChA63 followed by 10<sup>7</sup>pfu MVA expressing either *PfCSP* or *PfUIS3*, and with 15000 *PfCSP@PbCSP* or *PfCSP@PbUIS4* sporozoites. Cells were harvested 24 to 28 hours later to measure the frequency of GFP<sup>+</sup> cells by flow cytometry and to calculate the percentage of inhibition of the samples against the two different *P. berghei* lines. Grey bars represent the inhibition of naïve serum controls.

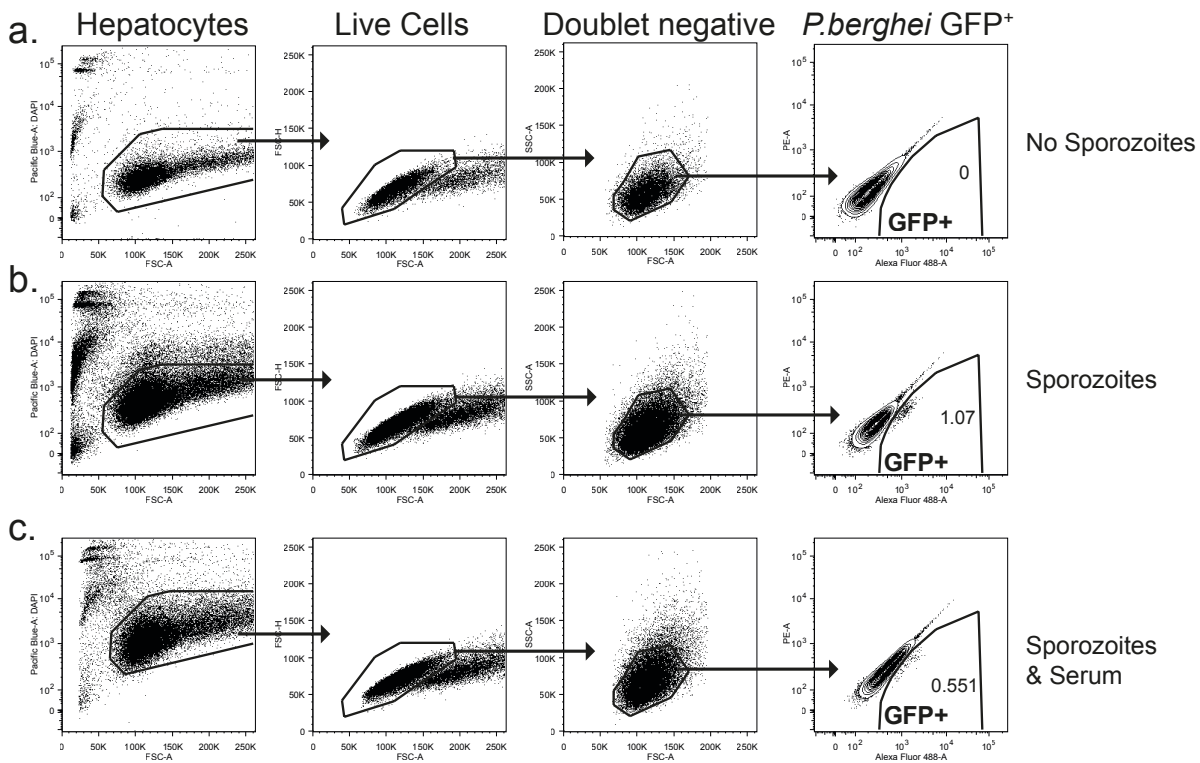

**Figure S4: Gating strategy for detection of *P. berghei* infected cells**

*PbGFP* infected hepatocytes were identified by gating for live cells (DAPI negative), size (FSC-A vs SSC-A), removing doublets (FSC-A vs FSC-H) and then gating for GFP<sup>+</sup> relative to auto-fluoresce in the adjacent PE channel.
